# Supplementary material for: Eosinopenia is a predictive factor for the severity of acute ischemic stroke
Source: PubMed Central journal article supplement — Neural Regen Res. 2019 Oct;14(10):1772–9. doi: 10.4103/1673-5374.258411 (PMC6585555; doi:10.4103/1673-5374.258411), 2019-10
Supplement: NRR-14-1772_Suppl1.pdf [file NRR-14-1772_Suppl1.pdf]

苏州大学附属第二医院国家药物临床试验机构伦理委员会

临床研究审批件

审查时间：2015年11月10日

(2015)伦审科研第(K10)号

|             |                                                                  |       |                                                                    |
|-------------|------------------------------------------------------------------|-------|--------------------------------------------------------------------|
| 试验项目名称      | 早期瑞舒伐他汀钙干预对急性缺血性卒中患者预后影响的临床研究                                    |       |                                                                    |
| 申办单位        |                                                                  |       |                                                                    |
| 项目分类        | 科研                                                               |       |                                                                    |
| 医疗机构        | 苏州大学附属第二医院                                                       | 主要研究者 | 刘春风                                                                |
| 承担科室(专业组)   | 神经内科                                                             | 承担责任  | 负责 <input checked="" type="checkbox"/> 参与 <input type="checkbox"/> |
| 审 查 文 件 名 称 |                                                                  | 版本    | 日期                                                                 |
| 临床试验方案:     | 有 <input checked="" type="checkbox"/> 无 <input type="checkbox"/> | 1.0   | 2015.10                                                            |
| 知情同意书:      | 有 <input checked="" type="checkbox"/> 无 <input type="checkbox"/> | 1.0   | 2015.10                                                            |
| 其他相关文件:     | 有 <input checked="" type="checkbox"/> 无 <input type="checkbox"/> | NA    | NA                                                                 |

审查意见:

同意进行临床研究

主任委员签字

*吴皓荣*

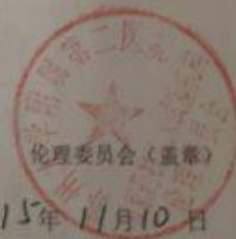

2015年11月10日
