# Supplementary material for: Eosinopenia is a predictive factor for the severity of acute ischemic stroke
Source: PubMed Central journal article supplement — Neural Regen Res. 2019 Oct;14(10):1772–9. doi: 10.4103/1673-5374.258411 (PMC6585555; doi:10.4103/1673-5374.258411), 2019-10
Supplement: NRR-14-1772_Suppl2.pdf [file NRR-14-1772_Suppl2.pdf]

## OPEN PEER REVIEW REPORT 1

**Reviewer:** Jigar Pravinchandra, Florida Atlantic University, USA.

**Comments to authors:**

Minor revisions:

The authors' findings about "Eosinopenia serves as a predictive factor for the severity of acute ischemic stroke" are very interesting; However, there are some concerns regarding preparation of this manuscript as follows:

1. Author must provide list of Abbreviations that all are used in manuscript for readers.

Missing abbreviation on TOAST on page 5, line no 53.

2. I recommend to checked for grammar and typo errors. Please proofread the manuscript before resubmission.

- In abstract, page 2 line no 39; Binary logistic regress analysis is different from Page 4 line no 34 Binary logistic regression analysis. So please correct the word regress in abstract.

- In results section, on page 5, line no. 56 there is space needed between the word strokewere. Similarly, in discussion section, on page 6, line no. 42 need a space between the word rarecondition.

- Author used acronym for eosinophil peroxidase is EPOX on page 7, line no. 25. On page 8, line no. 9 Eosinophil granule proteins, ECP, EPO, and MBP, possess antibacterial properties.

So, author should clarify this difference between EPO & EPOX? Or correct the acronym whatever he need to be used.

3. In results section, Page 3, line no. 56-57 states that A total of 421 eligible patients were recruited in our study, including 273 males (64.8%) and 144 females (35.2%). When you add  $273 + 144 = 417$  total patients were found. So please make sure about details of total no of patients. Explain what happened to 4 subjects if total patients are 421.

4. Also, on 2.2 results section, author show that as shown in Table 1, There are significant differences in sex ( $P=0.001$ ). So, based on table 1, There is difference found between male sex so all data based on male sex. Because in table 2 also author show that male sex blood eosinophils percentage quartiles. So please correct sentence that he only found difference in male sex because there is no female sex blood eosinophils percentage quartiles author showed in table? Missing data on female 144 patients in tables.

5. In methods section on page 9, line no 6, author mentioned about exclusion of subjects from study. Did he exclude patients with previous history of stroke or he included the patients with previous history of stroke?
